# Supplementary material for: Positioning the Value of Dietary Carbohydrate, Carbohydrate Quality, Glycemic Index, and GI Labelling to the Canadian Consumer for Improving Dietary Patterns
Source: PubMed Central journal article supplement (PMC6412396; doi:10.3390/nu11020457), 2019-02-22
Supplement: nutrients-11-00457-s001.pdf [file nutrients-11-00457-s001.pdf]

## Supplementary Appendix 1 A-C

### Positioning the Value of the Dietary Carbohydrate, Carbohydrate Quality, the Glycemic Index, and GI Labelling to the Canadian Consumer for Improving Dietary Patterns

Christopher P.F. Marinangeli PhD, RD<sup>1</sup>, Joanna Castellano,<sup>2</sup> Peg Torrance,<sup>2</sup> Joanne Lewis RD,<sup>3</sup> Carolyn Gall Casey,<sup>3</sup> Jackie Tanuta,<sup>1</sup> Julianne Curran PhD,<sup>1</sup> Scott V. Harding PhD,<sup>4</sup> David JA Jenkins MD PhD,<sup>5-8</sup> John L. Sievenpiper MD PhD<sup>5-8</sup>

<sup>1</sup>Pulse Canada. 920-220 Portage Avenue, Winnipeg MB, R3C 0A5, Canada; <sup>2</sup>Q Quest. First Canadian Place, 100 King St W #5700, Toronto, ON, M5X 1C7, Canada; <sup>3</sup>Diabetes Canada. 1400 - 522 University Ave, Toronto, ON M5G 2R5, Canada; <sup>4</sup>Department of Biochemistry, Memorial University, St. John's NL A1C 5S7, Canada; <sup>5</sup> Department of Nutritional Sciences, Faculty of Medicine, University of Toronto, Toronto, Canada; <sup>6</sup> Clinical Nutrition & Risk Factor Modification Centre, St. Michael's Hospital Toronto, Canada; <sup>7</sup>Division of Endocrinology & Metabolism, St. Michael's Hospital, Toronto, Canada; <sup>8</sup>Li Ka Shing Knowledge Institute, St. Michael's Hospital, Toronto, Canada

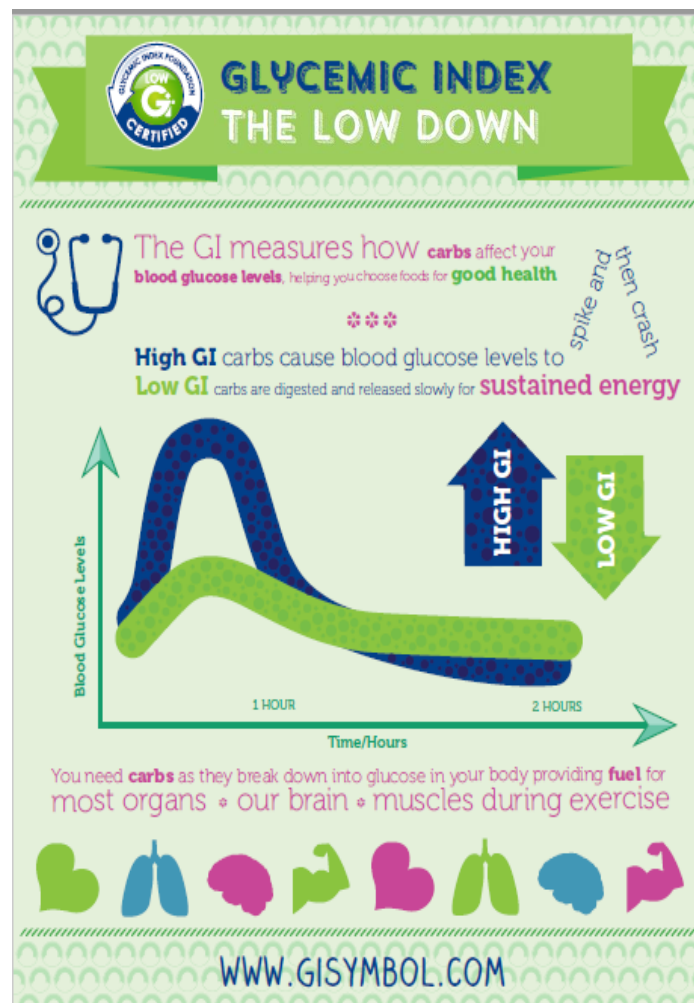

Supplementary Appendix 1A. Figure depicting the glycemic index (Adapted from the Glycemic Index Foundation[1]).



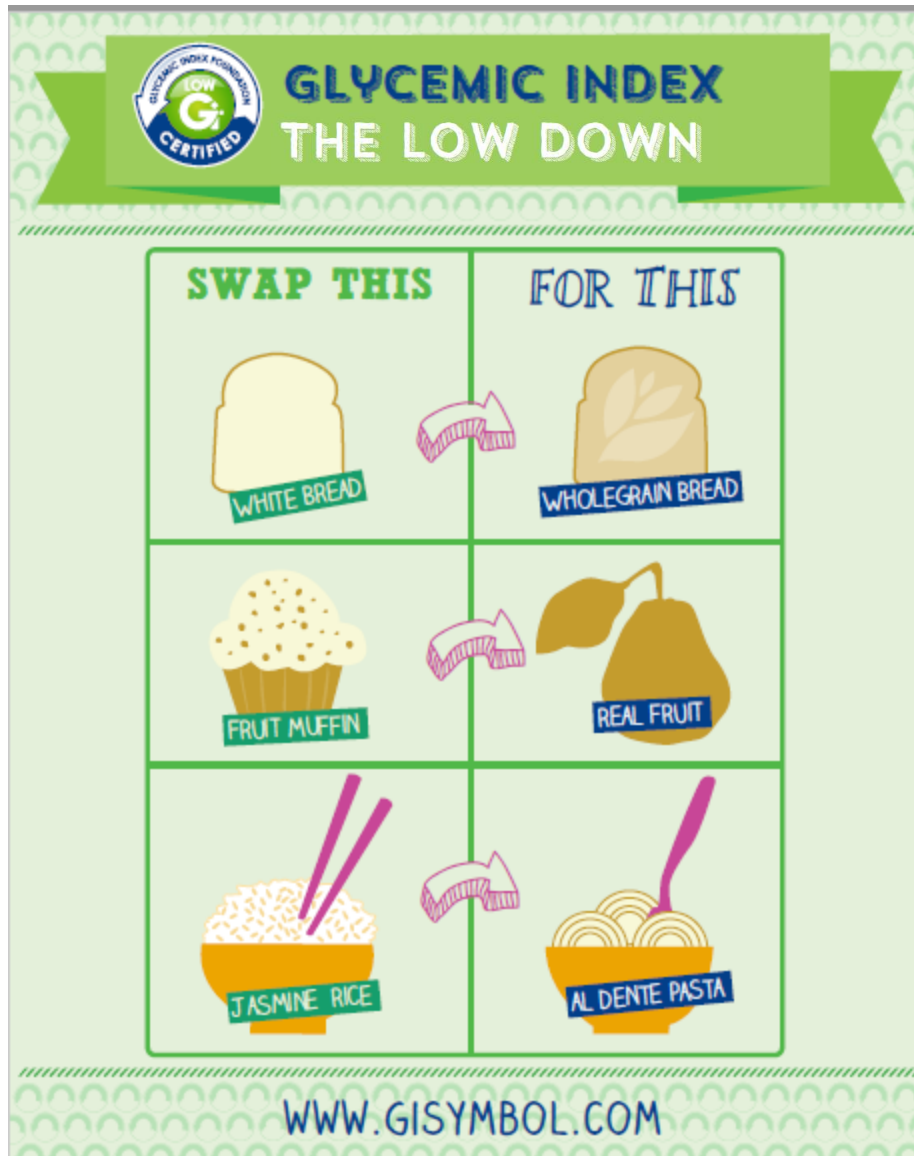

**Supplementary Appendix 1C.** Depiction of strategies for choosing low GI foods instead of high GI foods (Adapted from the Glycemic Index Foundation [3]).

## References

1. The Glycemic Index Foundation. Glycemic Index: What is GI. The Glycemic Index Foundation. <https://www.gisymbol.com/infographics/what-is-gi-infographic/> (October 10, 2018).
2. Diabetes Canada. The Glycemic Index. Diabetes Canada: Toronto, Ontario, 2013.
3. The Glycemic Index Foundation. Glycemic Index: Swap It. The Glycemic Index Foundation. <https://www.gisymbol.com/infographics/swap-it-infographic/> (October 10, 2018).

## Supplementary Appendix 2A-C

### Positioning the Value of the Dietary Carbohydrate, Carbohydrate Quality, the Glycemic Index, and GI Labelling to the Canadian Consumer for Improving Dietary Patterns

**Christopher P.F. Marinangeli PhD, RD<sup>1</sup>, Joanna Castellano,<sup>2</sup> Peg Torrance,<sup>2</sup> Joanne Lewis RD,<sup>3</sup> Carolyn Gall Casey,<sup>3</sup> Jackie Tanuta,<sup>1</sup> Julianne Curran PhD,<sup>1</sup> Scott V. Harding PhD,<sup>4</sup> David JA Jenkins MD PhD,<sup>5-8</sup> John L. Sievenpiper MD PhD<sup>5-8</sup>**

<sup>1</sup>Pulse Canada. 920-220 Portage Avenue, Winnipeg MB, R3C 0A5, Canada; <sup>2</sup>Q Quest. First Canadian Place, 100 King St W #5700, Toronto, ON, M5X 1C7, Canada; <sup>3</sup>Diabetes Canada. 1400 - 522 University Ave, Toronto, ON M5G 2R5, Canada; <sup>4</sup>Department of Biochemistry, Memorial University, St. John's NL A1C 5S7, Canada; <sup>5</sup> Department of Nutritional Sciences, Faculty of Medicine, University of Toronto, Toronto, Canada; <sup>6</sup> Clinical Nutrition & Risk Factor Modification Centre, St. Michael's Hospital Toronto, Canada; <sup>7</sup>Division of Endocrinology & Metabolism, St. Michael's Hospital, Toronto, Canada; <sup>8</sup>Li Ka Shing Knowledge Institute, St. Michael's Hospital, Toronto, Canada

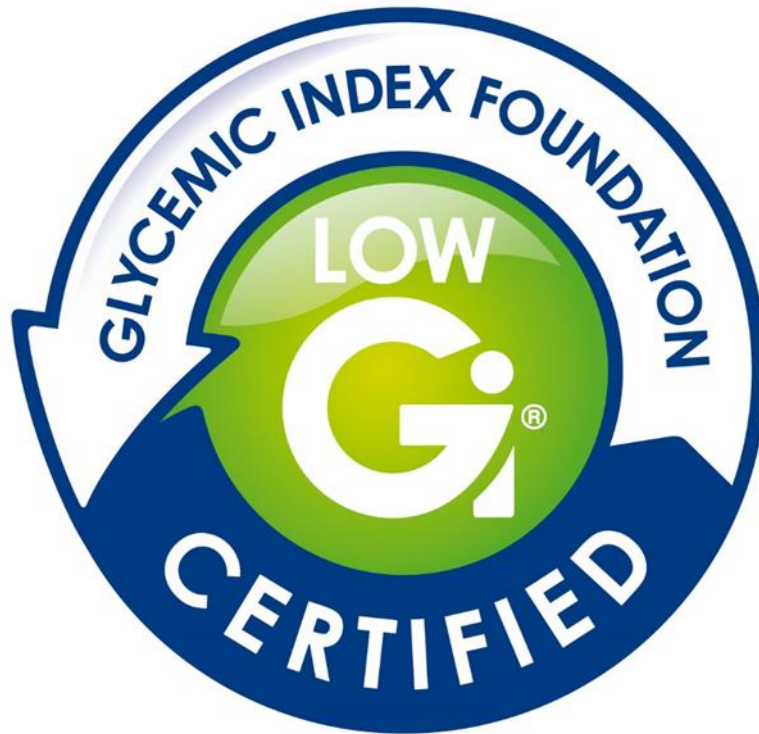

**Supplementary Appendix 2A.** The Glycemic Index Foundation's Low GI Symbol [1].

**GLYCEMIC INDEX  
THE LOW DOWN**

Look for the GI Symbol, your **TRUSTED** guide to make healthy low GI choices quick and easy

Foods carrying this  guarantee that they have been

- **reliably tested** ✓
- **meet very strict nutrient criteria** ✓

| NUTRITIONAL INFORMATION                 |  |
|-----------------------------------------|--|
| AVERAGE SERVING SIZE - 46g              |  |
| GI CERTIFIED ENSURES                    |  |
| SPECIFIC LIMITS FOR:                    |  |
| CARBS                                   |  |
| ENERGY                                  |  |
| TOTAL SATURATED FAT                     |  |
| ADEQUATE LEVELS OF (WHERE APPROPRIATE): |  |
| FIBRE                                   |  |
| CALCIUM                                 |  |

**TRUST**

[WWW.GISYMBOL.COM](http://WWW.GISYMBOL.COM)

**Supplementary Appendix 2B.** Figure depicting the use of the Glycemic Index Foundations GI Symbol on a hypothetical food product (Adapted from The Glycemic Index Foundation [2]).

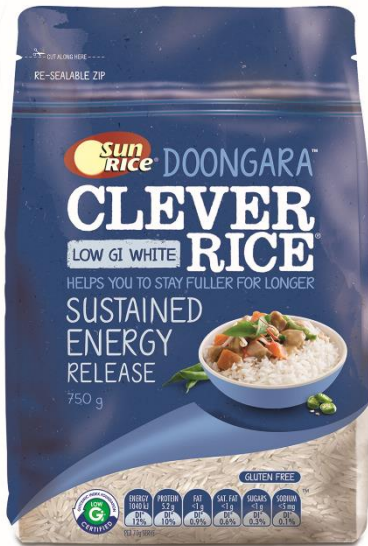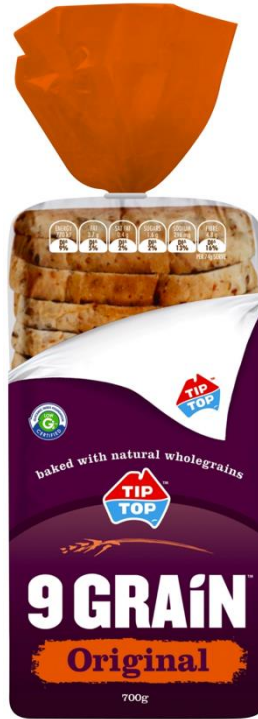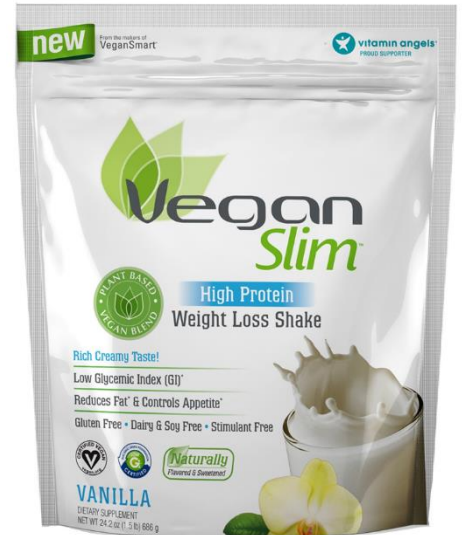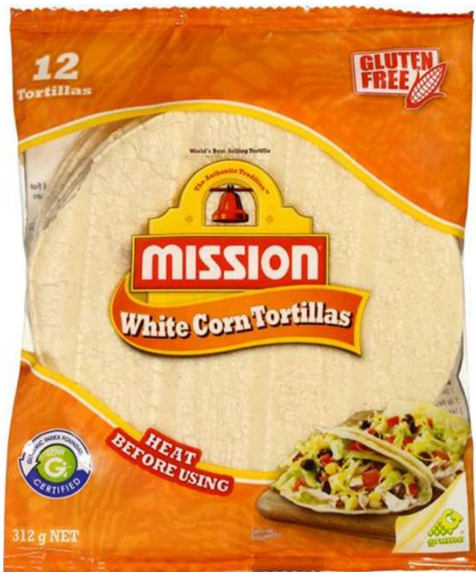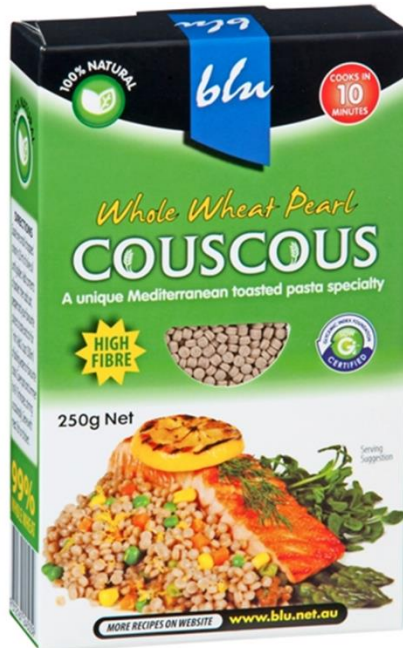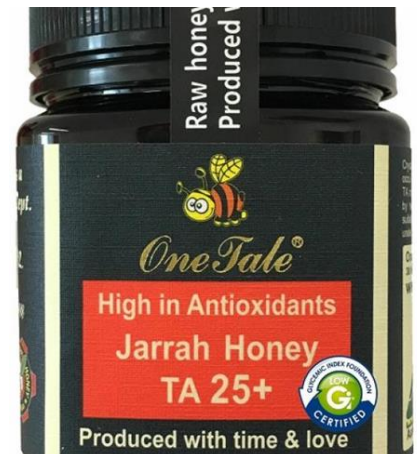

**Supplementary Appendix 2C.** Examples of foods with The Glycemic Index Foundation's Low GI Symbol shown to focus groups during Activity 3 [3].

## References

1. The Glycemic Index Foundation. The GI Symbol Program. The Glycemic Index Foundation. <https://www.gisymbol.com/> (october 4, 2018).
2. The Glycemic Index Foundation. Glycemic Index: The GI Symbol. The Glycemic Index Foundation. <https://www.gisymbol.com/infographics/the-gi-symbol-infographic/> (October 10, 2018).
3. The Glycemic Index Foundation. Low GI Products. The Glycemic Index Foundation. <https://www.gisymbol.com/products/> (October 10, 2018).
